# Supplementary material for: Detection of Activating Estrogen Receptor Gene ( ESR1 ) Mutations in Single Circulating Tumor Cells
Source: Oxford University Press journal article supplement (doi:10.1158/1078-0432.ccr-17-1173), 2017-07-05
Supplement: 10780432ccr171173-sup-182346_2_supp_4129169_xs997z.docx [file 10780432ccr171173-sup-182346_2_supp_4129169_xs997z.docx]

**SUPPLEMENTARY METHODS**

**S1: Primers List**

| **Primers** | **Sequence** | **Tm** | **Reference** |
| --- | --- | --- | --- |
| **ESR1-EX4-F** | TTGAACACTTACCAGCTCACC | 55 | NG_008493.1 |
| **ESR1-EX4-R** | AACACATCTCCTGTAACCTTG | 55 | NG_008493.1 |
| **ESR1-EX5-F** | GACCTTGTCAGTTCAAATCC | 57 | NG_008493.1 |
| **ESR1-EX5-R** | AGCAGAAAGTTATCCTTAGC | 57 | NG_008493.1 |
| **ESR1-EX6-F** | ACCCTTTCATGTCTTGTGGAAG | 55 | NG_008493.1 |
| **ESR1-EX6-R** | TCTTTACTATCTGGAGCCTGGA | 55 | NG_008493.1 |
| **ESR1-EX7-F** | TTAAATGGGTCCAGAGCATC | 55 | NG_008493.1 |
| **ESR1-EX7-R** | AGTGTCTTCAGGGGATGTGT | 55 | NG_008493.1 |
| **ESR1-EX8-F** | GCTAAGTGTCTTTGGAGTTC | 57 | NG_008493.1 |
| **ESR1-EX8-R** | CCCCAACCCATAGACTGAG | 57 | NG_008493.1 |
| **ESR1-EX4-F** | TTGAACACTTACCAGCTCACC | 55 | NG_008493.1 |
